# Supplementary material for: Boosting the OER activity of amorphous IrOx in acidic medium by tuning its electron structure using lanthanum salt nanosheets
Source: Royal Society of Chemistry journal article supplement (doi:10.1039/d2nj05464g), 2022-12-30
Supplement: d2nj05464g1.pdf [file d2nj05464g1.pdf]

## Supporting Information

### **Boosting the OER Activity of Amorphous IrO<sub>x</sub> in Acidic Medium by Tuning its Electron Structure Using Lanthanum Salt Nanosheets**

Xuefeng Wang,<sup>a</sup> Haeseong Jang,<sup>b,d</sup> Zijian Li,<sup>c</sup> Haisen Li,<sup>a</sup> Guangkai Li,<sup>a</sup> Min Gyu Kim,<sup>b,\*</sup> Xuqiang Ji,<sup>a,e,\*</sup> Qing Qin,<sup>a,\*</sup> and Xien Liu<sup>a,\*</sup>

<sup>a</sup>College of Chemical Engineering, Qingdao University of Science and Technology, Qingdao 266042, P. R. China. E-mail: xuqianglucky@163.com, qinqing@qust.edu.cn, liuxien@qust.edu.cn

<sup>b</sup>Beamline Research Division, Pohang Accelerator Laboratory (PAL), Pohang 790-784 (Korea).  
E-mail: mgkim@postech.ac.kr

<sup>c</sup>Department of Chemistry, City University of Hong Kong, Hong Kong SAR, China

<sup>d</sup>Energy Storage and Distributed Resources Division, Lawrence Berkeley National Laboratory, Berkeley, California 94720, United States

<sup>e</sup>College of Materials Science and Engineering, Qingdao University, Qingdao 266071, China

## List of contents

1. Materials characterizations

2. Electrochemical measurement

**Fig. S1** XRD pattern of the IrO<sub>x</sub>/LaCO<sub>3</sub>OH.

**Fig. S2** SEM pattern of the amorphous IrO<sub>x</sub>.

**Fig. S3** XRD pattern of the Amorphous IrO<sub>x</sub>.

**Fig. S4** HAADF-STEM image of the Amorphous IrO<sub>x</sub> and the corresponding elemental mappings of Ir, and O.

**Fig. S5** XRD pattern of the LaCO<sub>3</sub>OH.

**Fig. S6.** (a) The linear relationship between the velocity ratio of O<sub>2</sub>/N<sub>2</sub> and its GC peak area ratio. (b) GC profiles of O<sub>2</sub> and N<sub>2</sub> for IrO<sub>x</sub>/LaCO<sub>3</sub>OH after 0 and 600 s electrolysis.

**Fig. S7** Cyclic voltammograms recorded at various scan rates (10 ~ 120 mV s<sup>-1</sup>) for determining the double layer capacitance: (a) IrO<sub>x</sub>/LaCO<sub>3</sub>OH, (b) Commercial IrO<sub>2</sub>, (c) amorphous IrO<sub>x</sub>.

**Fig. S8** Nyquist plots of electrochemical impedance spectra (EIS) of the IrO<sub>x</sub>/LaCO<sub>3</sub>OH.

**Fig. S9** The durability testing of the IrO<sub>x</sub>/LaCO<sub>3</sub>OH by the chronopotentiometry at a benchmark of 10 mA cm<sup>-2</sup>.

**Fig. S10** Cyclic voltammograms recorded at various scan rates (10 ~ 120 mV s<sup>-1</sup>) for determining the double layer capacitance: (a) IrO<sub>x</sub>/LaCO<sub>3</sub>OH-3:1, (b) IrO<sub>x</sub>/LaCO<sub>3</sub>OH-4:1 and (c) The double-layer capacitances of catalysts prepared at different molar ratios.

**Fig. S11** (a) Polarization curves and (b) Tafel slopes of catalysts prepared at different molar ratios.

**Fig. S12** Cyclic voltammograms recorded at various scan rates (10 ~ 120 mV s<sup>-1</sup>) for determining the double layer capacitance: (a) IrO<sub>x</sub>/LaCO<sub>3</sub>OH-160 °C and (b) The double-layer capacitances of catalysts prepared at different temperatures.

**Fig. S13** (a) Polarization curves and (b) Tafel slopes of catalysts prepared at different temperatures.

**Fig. S14** Cyclic voltammograms recorded at various scan rates (10 ~ 120 mV s<sup>-1</sup>) for determining the double layer capacitance: (a) IrO<sub>x</sub>/LaCO<sub>3</sub>OH-12 h, (b) IrO<sub>x</sub>/LaCO<sub>3</sub>OH-36 h and (c) The double-layer capacitances of catalysts prepared at different reaction times.

**Fig. S15** (a) Polarization curves and (b) Tafel slopes of catalysts prepared at different reaction times.

**Fig. S16** SEM image of catalysts prepared with reaction for (a) 12 h and (b) 36 h.

**Table S1** Comparison of the overpotentials at  $10 \text{ mA cm}^{-2}$  with recently reported OER catalysts in acidic media.

## **Materials characterizations**

The morphology and composition of the materials were characterized by SEM, TEM, XRD, XPS, XANES and EXAFS measurements. The Rigaku diffraction system (D/Max2000) was used to record the XRD patterns of the prepared catalysts. The microstructures and morphology of catalysts were measured by the scanning electron microscope (Hitachi S-4800). The JEOL JEM-2100F transmission electron microscope was used to perform the TEM and HRTEM measurements. Thermo Scientific ESCALAB 250Xi X-ray photoelectron spectrometer was used to detect the electronic structure and chemical state of Ir and O elements in catalyst structure. The XANES of Ir L<sub>III</sub>-edge and La L<sub>III</sub>-edge were measured at room temperature by the BL10c beam line at the Pohang Light Source (PLS-II), Korea.

## Electrochemical measurement

In a typical three-electrode system, the 0.1 M HClO<sub>4</sub> solution was used as the electrolyte. The working electrode was prepared by loading of 5 μL of the catalyst ink on a glassy carbon (GC: 3 mm in diameter). Carbon rod and Ag/AgCl were used as counter and reference electrodes, respectively. The working electrode was prepared according to the steps below: First, the prepared catalyst powder (2 mg) was added into 100 μL of deionized water and 200 μL ethanol with 40 μL of 5 wt % Nafion solution. Next, 1mg of carbon black (XC-72) was added to the formulated ink. The polarization curves were measured in the potential range of 1.20 V to 1.70 V (vs RHE) and the scanning speed was 5 mV s<sup>-1</sup>. All data were compensated with iR (95%). ESI measurements were made at an open circuit potential in the frequency range of 100 kHz to 0.1 Hz. The durability testing was performed by a chronopotentiometry method at a current density of 10 mA cm<sup>-2</sup>. The activity and stability of commercially available IrO<sub>2</sub> (Macklin, 99.9%) for OER was determined under the same condition.

Measurement of the Faraday Efficiency: A piece of Ti mesh coated by 1 mg IrO<sub>x</sub>/LaCO<sub>3</sub>OH (surface area = 1 cm<sup>2</sup>) was used as the working electrode. Before measurement, the cell was purged by N<sub>2</sub> gas for about 20 min to to detect the air tightness of the cell. A linear relationship between the O<sub>2</sub> and N<sub>2</sub> gas flow rate and its GC peak area ratio was obtained by plotting five GC measurements of adjust flow rate O<sub>2</sub> samples with fixed flow rate of N<sub>2</sub> is 5 sccm. The GC measurements were measured by FULI INSTRUMENTS GC 9790 plus gas chromatograph.

The GC peak area has a relationship:  $A(\text{oxygen product}) = [A(\text{oxygen } 600 \text{ s}) - A(\text{oxygen } 0 \text{ s})]$ , as shown in Fig. S6. Therefore,  $A(\text{N}_2/\text{O}_2) = A(\text{nitrogen } 600\text{s})/A[(\text{oxygen } 600\text{s}) - A(\text{oxygen } 0\text{s})] = 4518290/[88888.4 - 29650.8] = 76.27$ . Take this ratio into the linear equation.  $\text{O}_2$  flow rate =  $5/[1.965 \times 76.27 - 0.36899] = 0.03345$  sccm. The product amount is  $n_{\text{O}_2} = 0.03345 \times 10 \times 10^{-3} / 22.45 = 1.49 \mu\text{mol}$ . After 600s, amount of charge transferred by reaction were 6.0189C. The ideal product amount is  $n(\text{O}_2, \text{theoretical}) = C/F/4 = 6.0189/(96485 \times 4) = 1.56 \mu\text{mol}$ , where C is the amount of charge transferred, F is the faraday constant ( $96485 \text{ C mol}^{-1}$ ). Therefore, the Faraday efficiency is  $n(\text{O}_2, \text{experimental})/n(\text{O}_2, \text{theoretical}) \times 100\% = 1.49/1.56 \times 100\% = 95.5\%$ .

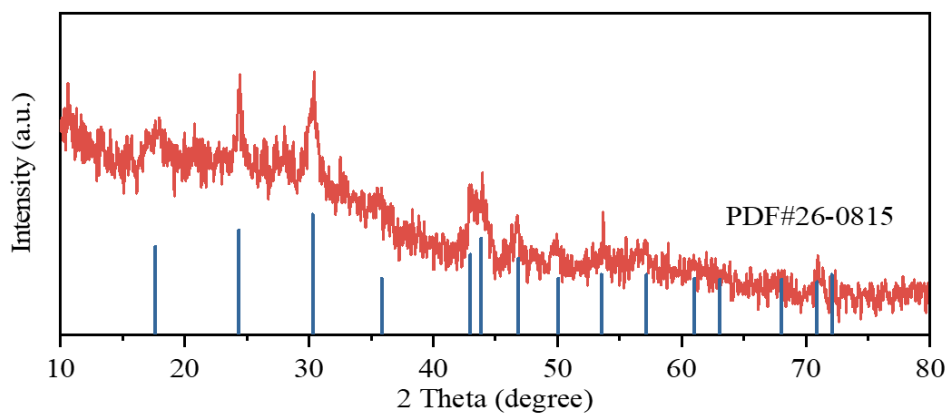

**Fig. S1** The XRD pattern of the IrO<sub>x</sub>/LaCO<sub>3</sub>OH.



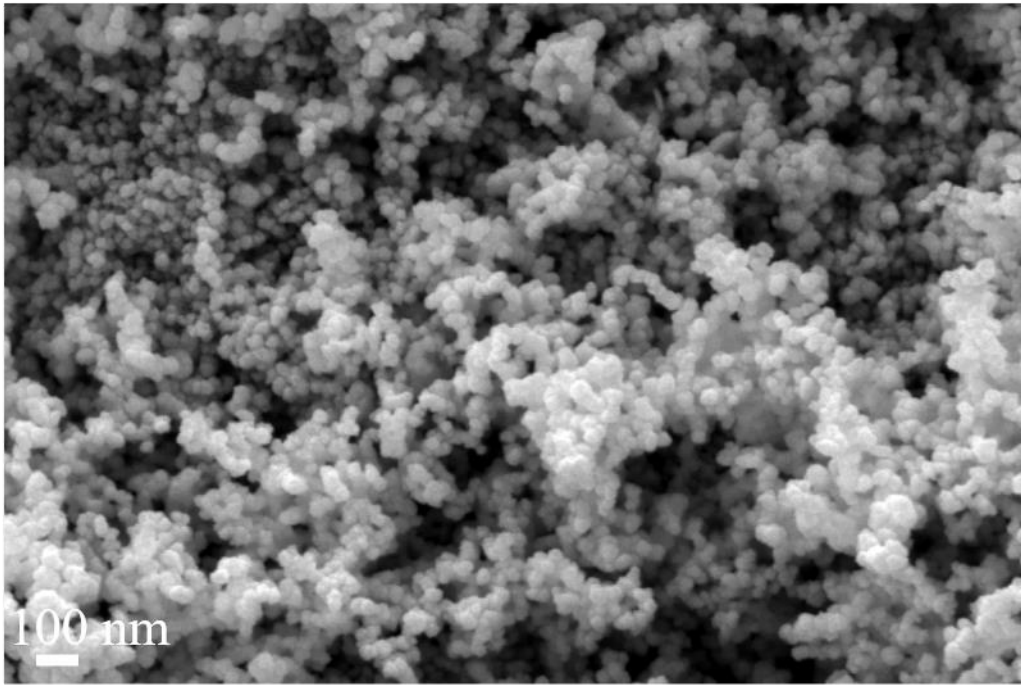

**Fig. S2** The SEM pattern of the amorphous IrO<sub>x</sub>.

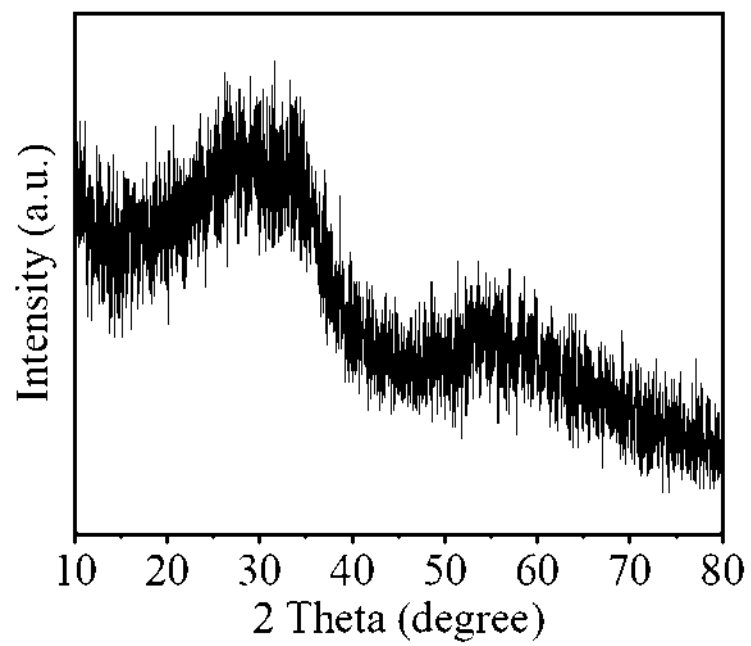

**Fig. S3** The XRD pattern of the Amorphous IrO<sub>x</sub>.

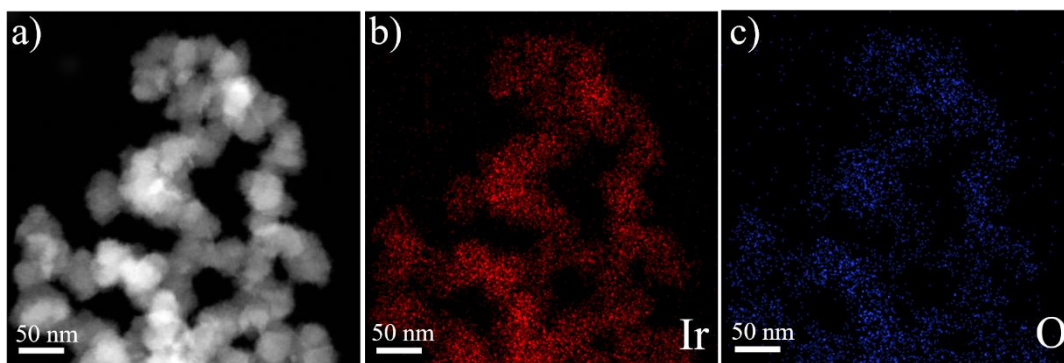

**Fig. S4** HAADF-STEM image of the Amorphous  $\text{IrO}_x$  and the corresponding elemental mappings of Ir, and O.

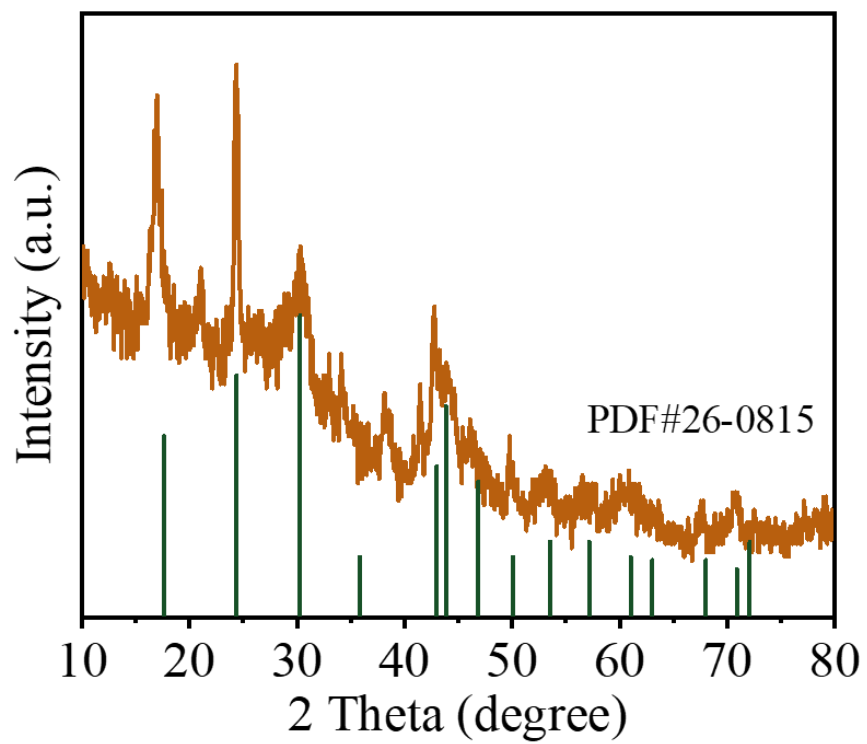

**Fig. S5** The XRD pattern of the LaCO<sub>3</sub>OH.

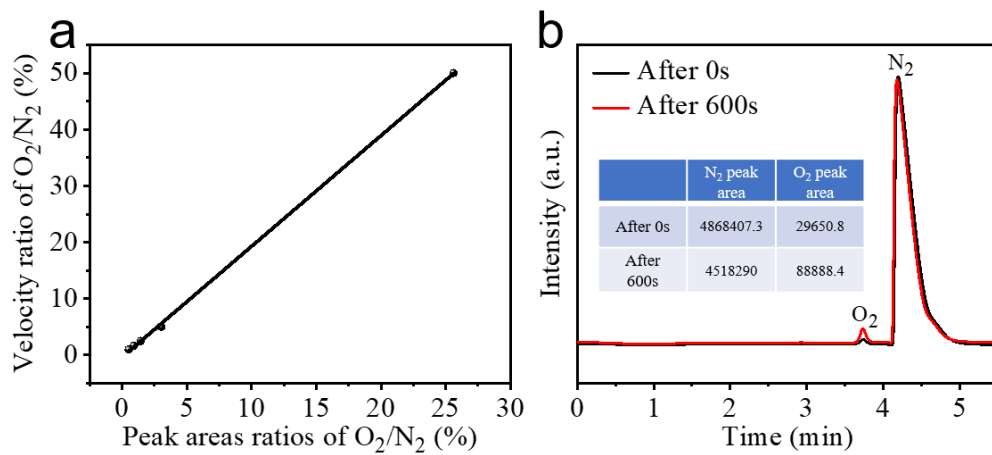

**Fig. S6.** (a) The linear relationship between the velocity ratio of  $O_2/N_2$  and its GC peak area ratio. (b) GC profiles of  $O_2$  and  $N_2$  for  $IrO_x/LaCO_3OH$  after 0 and 600 s electrolysis.

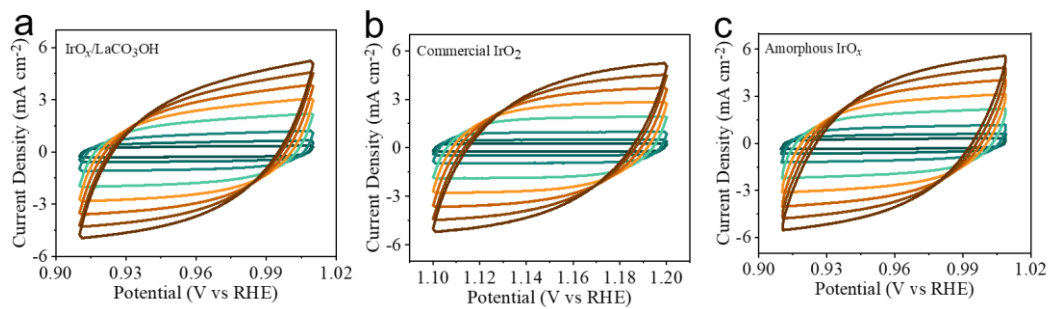

**Fig. S7** Cyclic voltammograms recorded at various scan rates (10 ~ 120 mV s<sup>-1</sup>) for determining the double layer capacitance: (a) IrO<sub>x</sub>/LaCO<sub>3</sub>OH, (b) Commercial IrO<sub>2</sub>, (c) Amorphous IrO<sub>x</sub>.

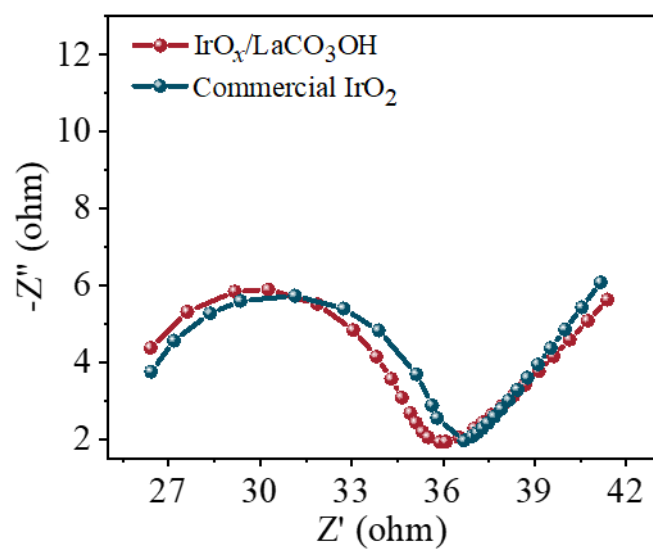

**Fig. S8** Nyquist plots of electrochemical impedance spectra (EIS) of the IrO<sub>x</sub>/LaCO<sub>3</sub>OH.

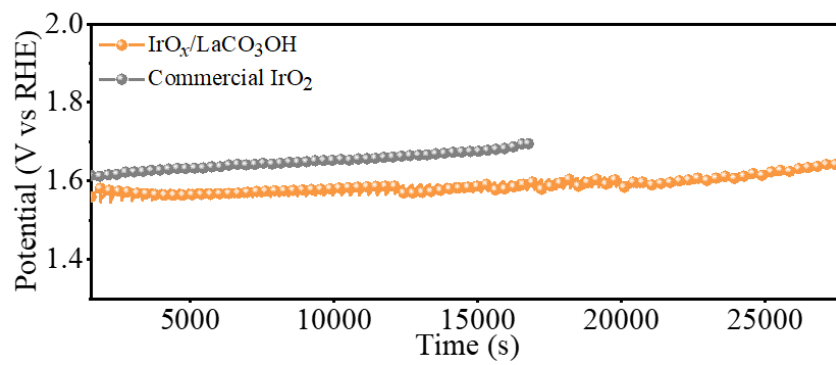

**Fig. S9** Long-term chrono potentiometric curves of IrO<sub>x</sub>/LaCO<sub>3</sub>OH and Commercial IrO<sub>2</sub> at 10 mA cm<sup>-2</sup>.



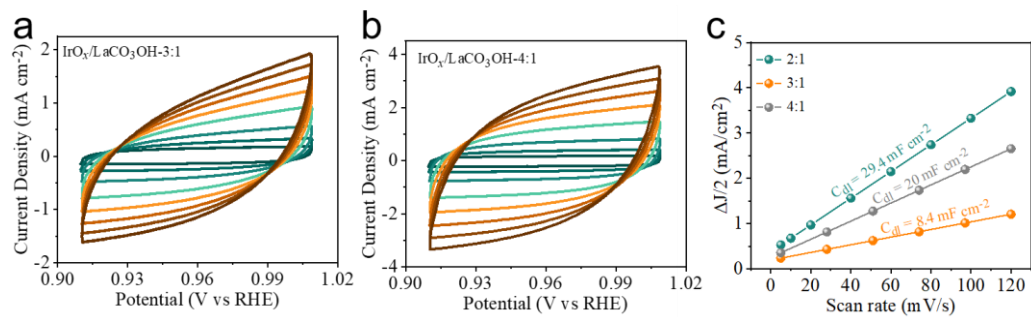

**Fig. S10** Cyclic voltammograms recorded at various scan rates (10 ~ 120 mV s<sup>-1</sup>) for determining the double layer capacitance: (a) IrO<sub>x</sub>/LaCO<sub>3</sub>OH-3:1, (b) IrO<sub>x</sub>/LaCO<sub>3</sub>OH-4:1 and (c) The double-layer capacitances of catalysts prepared at different molar ratios.

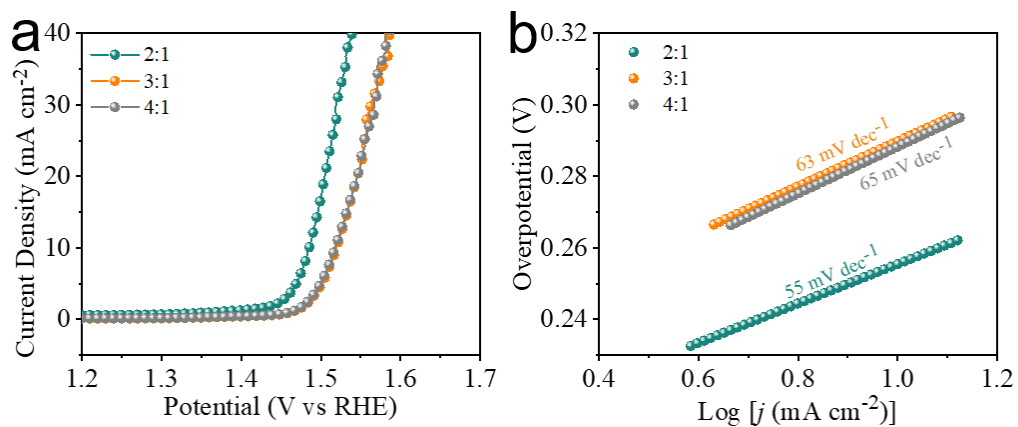

**Fig. S11** (a) Polarization curves and (b) Tafel slopes of catalysts prepared at different molar ratios.

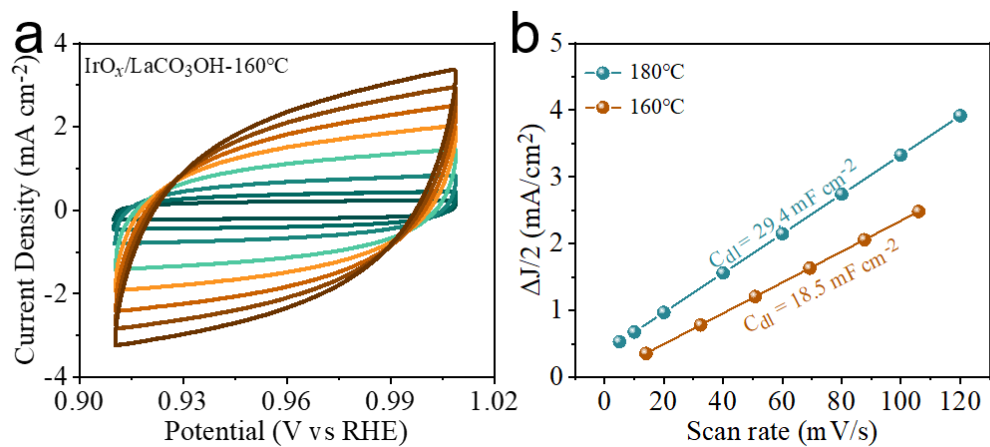

**Fig. S12** Cyclic voltammograms recorded at various scan rates (10 ~ 120 mV s<sup>-1</sup>) for determining the double layer capacitance: (a) IrO<sub>x</sub>/LaCO<sub>3</sub>OH-160°C and (b) The double-layer capacitances of catalysts prepared at different temperatures.

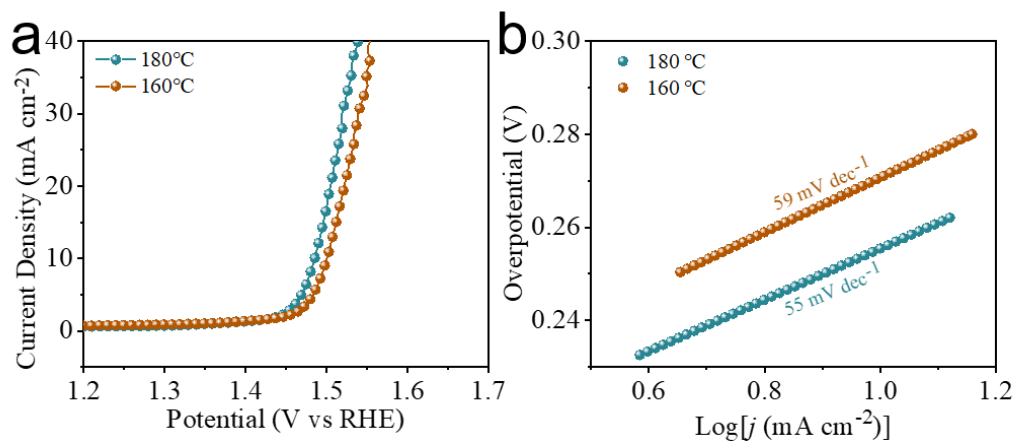

**Fig. S13** (a) Polarization curves and (b) Tafel slopes of catalysts prepared at different temperatures.

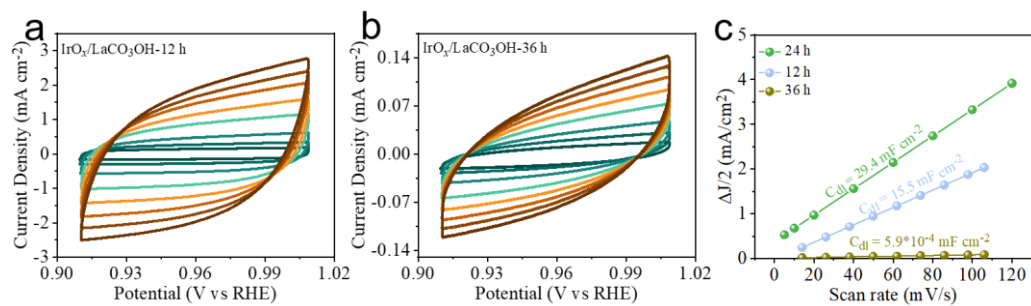

**Fig. S14** Cyclic voltammograms recorded at various scan rates (10 ~ 120 mV s<sup>-1</sup>) for determining the double layer capacitance: (a) IrO<sub>x</sub>/LaCO<sub>3</sub>OH-12 h, (b) IrO<sub>x</sub>/LaCO<sub>3</sub>OH-36 h and (c) The double-layer capacitances of catalysts prepared at different reaction times.

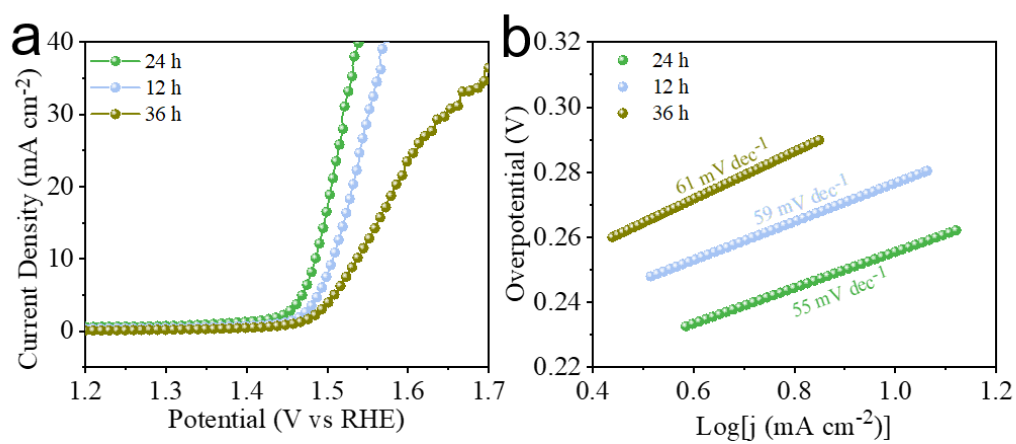

**Fig. S15** (a) Polarization curves and (b) Tafel slopes of catalysts prepared at different reaction times.

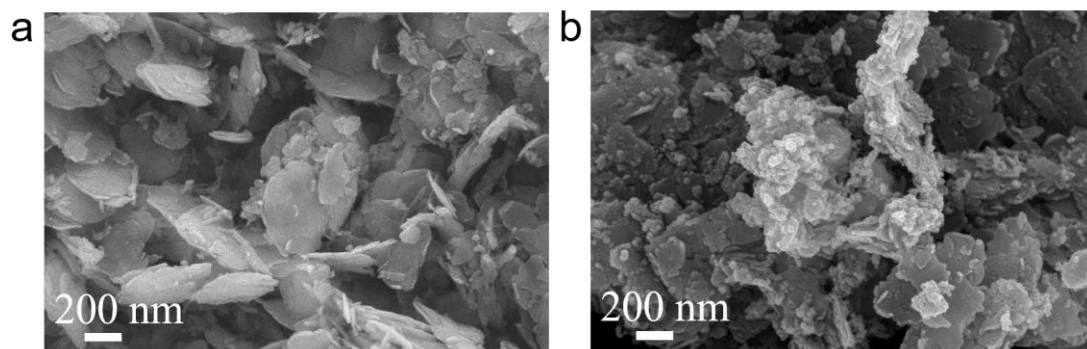

**Fig. S16.** SEM image of catalysts prepared with reaction for (a) 12 h and (b) 36 h.

**Table S1** Comparison of the overpotentials at  $10 \text{ mA cm}^{-2}$  with recently reported OER catalysts in acidic media

| Electrocatalyst                                                        | Electrolyte                          | Overpotential(mV)          | References |
|------------------------------------------------------------------------|--------------------------------------|----------------------------|------------|
|                                                                        |                                      | at $10 \text{ mA cm}^{-2}$ |            |
| Commercial RuO <sub>2</sub>                                            | 0.1 M HClO <sub>4</sub>              | 315                        | This work  |
| IrO <sub>x</sub> /LaCO <sub>3</sub> OH                                 | 0.1 M HClO <sub>4</sub>              | 255                        | This work  |
| NiIrRuAl-1/3                                                           | 0.1 M HClO <sub>4</sub>              | 237                        | [1]        |
| 6H-SrIrO <sub>3</sub>                                                  | 0.5 M H <sub>2</sub> SO <sub>4</sub> | 248                        | [2]        |
| La-Ir NF                                                               | 0.1 M HClO <sub>4</sub>              | 263                        | [3]        |
| SrIrO-1100                                                             | 0.5 M H <sub>2</sub> SO <sub>4</sub> | 263                        | [4]        |
| RuCu                                                                   | 0.5 M H <sub>2</sub> SO <sub>4</sub> | 270                        | [5]        |
| IrCuNi DCNCs                                                           | 0.1 M HClO <sub>4</sub>              | 273                        | [6]        |
| Ni <sub>0.34</sub> Co <sub>0.46</sub> Ir <sub>0.2</sub> O <sub>6</sub> | 0.1 M HClO <sub>4</sub>              | 280                        | [7]        |
| IrCo                                                                   | 0.5 M H <sub>2</sub> SO <sub>4</sub> | 284                        | [8]        |
| Ir <sub>0.4</sub> Mn <sub>0.6</sub> O <sub>6</sub>                     | 0.1 M H <sub>2</sub> SO <sub>4</sub> | 285                        | [9]        |
| Sr <sub>2</sub> IrO <sub>4</sub>                                       | 0.1 M HClO <sub>4</sub>              | 286                        | [10]       |
| La <sub>3</sub> IrO <sub>7</sub> -SLD                                  | 0.1 M HClO <sub>4</sub>              | 296                        | [11]       |
| Ir <sub>0.06</sub> Co <sub>2.94</sub> O <sub>4</sub>                   | 0.1 M HClO <sub>4</sub>              | 300                        | [12]       |
| IrO <sub>x</sub> -03                                                   | 0.1 M HClO <sub>4</sub>              | 300                        | [13]       |
| IrO <sub>x</sub> /Pr <sub>3</sub> IrO <sub>7</sub>                     | 0.1 M HClO <sub>4</sub>              | 305                        | [14]       |
| IrNiO <sub>x</sub> TF                                                  | 0.1 M HClO <sub>4</sub>              | 315                        | [15]       |
| Ir/C <sub>04</sub> N                                                   | 0.5 M H <sub>2</sub> SO <sub>4</sub> | 319                        | [16]       |



---

|                                                      |                                      |     |      |
|------------------------------------------------------|--------------------------------------|-----|------|
| <b>0.5IrO<sub>2</sub>-0.5SiO<sub>2</sub></b>         | 0.5 M H <sub>2</sub> SO <sub>4</sub> | 322 | [17] |
| <b>IrNi/NiOHT</b>                                    | 0.1 M HClO <sub>4</sub>              | 329 | [18] |
| <b>Ir<sub>0.7</sub>Co<sub>0.3</sub>O<sub>x</sub></b> | 0.5 M H <sub>2</sub> SO <sub>4</sub> | 330 | [19] |
| <b>IrNiO<sub>x</sub></b>                             | 0.1 M HClO <sub>4</sub>              | 332 | [18] |
| <b>Ir HT</b>                                         | 0.1 M HClO <sub>4</sub>              | 336 | [18] |
| <b>Ir<sub>0.3</sub>Mo<sub>0.7</sub>O<sub>6</sub></b> | 0.1 M HClO <sub>4</sub>              | 345 | [20] |
| <b>Ir/Ni<sub>4</sub>N</b>                            | 0.5 M H <sub>2</sub> SO <sub>4</sub> | 346 | [16] |
| <b>Ba<sub>2</sub>YIrO<sub>6</sub></b>                | 0.1 M HClO <sub>4</sub>              | 350 | [21] |
| <b>K<sub>x=0.25</sub>IrO<sub>2</sub></b>             | 0.1 M HClO <sub>4</sub>              | 350 | [22] |
| <b>SrIrO<sub>3</sub></b>                             | 0.1 M HClO <sub>4</sub>              | 353 | [10] |
| <b>Bi<sub>2</sub>Ir<sub>2</sub>O<sub>7</sub></b>     | 1 M H <sub>2</sub> SO <sub>4</sub>   | 365 | [23] |
| <b>RuIrCoO<sub>x</sub></b>                           | 0.5 M H <sub>2</sub> SO <sub>4</sub> | 394 | [24] |

---

## References

- [1] N. Liu, K. Yin, C. Si, T. Kou, Y. Zhang, W. Ma, Z. Zhang, Hierarchically porous nickel–iridium–ruthenium–aluminum alloys with tunable compositions and electrocatalytic activities towards the oxygen/hydrogen evolution reaction in acid electrolyte, *J. Mater. Chem. A.*, 2020, **8**, 6245-6255.
- [2] L. Yang, G. Yu, X. Ai, W. Yan, H. Duan, W. Chen, X. Li, T. Wang, C. Zhang, X. Huang, J.S. Chen, X. Zou, Efficient oxygen evolution electrocatalysis in acid by a perovskite with face-sharing IrO<sub>6</sub> octahedral dimers, *Nat. Commun.*, 2018, **9**, 5236.
- [3] W. Sun, C. Ma, X. Tian, J. Liao, J. Yang, C. Ge, W. Huang, An amorphous lanthanum–iridium solid solution with an open structure for efficient water splitting, *J. Mater. Chem. A.*, 2020, **8**, 12518-12525.
- [4] L. Zhang, H. Jang, Z. Li, H. Liu, M. G. Kim, X. Liu, J. Cho, SrIrO<sub>3</sub> modified with laminar Sr<sub>2</sub>IrO<sub>4</sub> as a robust bifunctional electrocatalyst for overall water splitting in acidic media, *Chem. Eng. J.*, 2021, **419**, 129604.
- [5] Y. Li, W. Zhou, X. Zhao, W. Cheng, H. Su, H. Zhang, M. Liu, Q. Liu, Donutlike RuCu Nanoalloy with Ultrahigh Mass Activity for Efficient and Robust Oxygen Evolution in Acid Solution, *ACS Appl. Energy Mater.*, 2019, **2**, 7483-7489.
- [6] D. Liu, Q. Lv, S. Lu, J. Fang, Y. Zhang, X. Wang, Y. Xue, W. Zhu, Z. Zhuang, IrCuNi Deeply Concave Nanocubes as Highly Active Oxygen Evolution Reaction Electrocatalyst in Acid Electrolyte, *Nano Lett.*, 2021, **21**, 2809-2816.
- [7] W. Q. Zaman, W. Sun, M. Tariq, Z. Zhou, U. Farooq, Z. Abbas, L. Cao, J. Yang,

Iridium substitution in nickel cobaltite renders high mass specific OER activity and durability in acidic media, *Appl. Catal. B*, 2019, **244**, 295-302.

- [8] J. Zhu, M. Wei, Q. Meng, Z. Chen, Y. Fan, S. W. Hasan, X. Zhang, D. Lyu, Z. Q. Tian, P. K. Shen, Ultrathin-shell IrCo hollow nanospheres as highly efficient electrocatalysts towards the oxygen evolution reaction in acidic media, *Nanoscale.*, 2020, **12**, 24070-24078.
- [9] Z. Zhou, W. Q. Zaman, W. Sun, L. M. Cao, M. Tariq, J. Yang, Cultivating crystal lattice distortion in IrO<sub>2</sub> via coupling with MnO<sub>2</sub> to boost the oxygen evolution reaction with high intrinsic activity, *Chem Commun.*, 2018, **54**, 4959-4962.
- [10] A. L. Strickler, D. Higgins, T. F. Jaramillo, Crystalline Strontium Iridate Particle Catalysts for Enhanced Oxygen Evolution in Acid, *ACS Appl. Energy Mater.*, 2019, **2**, 5490-5498.
- [11] Q. Qin, H. Jang, Y. Wang, L. Zhang, Z. Li, M. G. Kim, S. Liu, X. Liu, J. Cho, Getting La Effect from La<sub>3</sub>IrO<sub>7</sub> as a Highly Efficient Electrocatalyst for Oxygen Evolution Reaction in Acid Media, *Adv. Energy Mater.*, 2020, **11**, 2003561.
- [12] J. Shan, C. Ye, S. Chen, T. Sun, Y. Jiao, L. Liu, C. Zhu, L. Song, Y. Han, M. Jaroniec, Y. Zhu, Y. Zheng, S. Z. Qiao, Short-Range Ordered Iridium Single Atoms Integrated into Cobalt Oxide Spinel Structure for Highly Efficient Electrocatalytic Water Oxidation, *J. Am. Chem. Soc.*, 2021, **143**, 5201-5211.
- [13] R. Sharma, M. A. Karlsen, P. Morgen, J. Chamier, D. B. Ravnsbæk, S. M. Andersen, Crystalline Disorder, Surface Chemistry, and Their Effects on the

Oxygen Evolution Reaction (OER) Activity of Mass-Produced Nanostructured Iridium Oxides, *ACS Appl. Energy Mater.*, 2021, **4**, 2552-2562.

- [14] Y. Wang, S. Liu, Q. Qin, H. Liu, L. Zhang, T. Wei, H. Li, X. Liu, Praseodymium iridium oxide as a competitive electrocatalyst for oxygen evolution reaction in acid media, *Sci. China Mater.*, 2021, **64**, 2193-2201.
- [15] T. Reier, Z. Pawolek, S. Cherevko, M. Bruns, T. Jones, D. Teschner, S. Selve, A. Bergmann, H.N. Nong, R. Schlogl, K.J. Mayrhofer, P. Strasser, Molecular Insight in Structure and Activity of Highly Efficient, Low-Ir Ir-Ni Oxide Catalysts for Electrochemical Water Splitting (OER), *J. Am. Chem. Soc.*, 2015, **137**, 13031-13040.
- [16] B. M. Tackett, W. Sheng, S. Kattel, S. Yao, B. Yan, K. A. Kuttiyiel, Q. Wu, J.G. Chen, Reducing Iridium Loading in Oxygen Evolution Reaction Electrocatalysts Using Core–Shell Particles with Nitride Cores, *ACS Catal.*, 2018, **8**, 2615-2621.
- [17] J. J. Zhang, J. M. Hu, J. Q. Zhang, C. N. Cao, IrO<sub>2</sub>–SiO<sub>2</sub> binary oxide films: Geometric or kinetic interpretation of the improved electrocatalytic activity for the oxygen evolution reaction, *Int. J. of Hydrogen Energ.*, 2011, **36**, 5218-5226.
- [18] C. Spöri, P. Briois, H. N. Nong, T. Reier, A. Billard, S. Köhl, D. Teschner, P. Strasser, Experimental Activity Descriptors for Iridium-Based Catalysts for the Electrochemical Oxygen Evolution Reaction (OER), *ACS Catal.*, 2019, **9**, 6653-6663.
- [19] W. Hu, H. Zhong, W. Liang, S. Chen, Ir-Surface enriched porous Ir-Co oxide hierarchical architecture for high performance water oxidation in acidic media,

ACS Appl. Mater Inter., 2014, **6**, 12729-12736.

- [20] M. Tariq, W.Q. Zaman, W. Sun, Z. Zhou, Y. Wu, L.-m. Cao, J. Yang, Unraveling the Beneficial Electrochemistry of IrO<sub>2</sub>/MoO<sub>3</sub> Hybrid as a Highly Stable and Efficient Oxygen Evolution Reaction Catalyst, *ACS Sustainable Chem. Eng.*, 2018, **6**, 4854-4862.
- [21] O. Diaz-Morales, S. Raaijman, R. Kortlever, P. J. Kooyman, T. Wezendonk, J. Gascon, W. T. Fu, M. T. Koper, Iridium-based double perovskites for efficient water oxidation in acid media, *Nat. Commun.*, 2016, **7**, 12363.
- [22] W. Sun, Y. Song, X. Q. Gong, L. M. Cao, J. Yang, Hollandite Structure K(x approximately 0.25)IrO<sub>2</sub> Catalyst with Highly Efficient Oxygen Evolution Reaction, *ACS Appl. Mater Inter.*, 2016, **8**, 820-826.
- [23] K. Sardar, S.C. Ball, J. D. B. Sharman, D. Thompsett, J. M. Fisher, R. A. P. Smith, P. K. Biswas, M. R. Lees, R. J. Kashtiban, J. Sloan, R. I. Walton, Bismuth Iridium Oxide Oxygen Evolution Catalyst from Hydrothermal Synthesis, *Chem. Mater.*, 2012, **24**, 4192-4200.
- [24] J. L. Corona-Guinto, L. Cardeño-García, D. C. Martínez-Casillas, J. M. Sandoval-Pineda, P. Tamayo-Meza, R. Silva-Casarin, R. G. González-Huerta, Performance of a PEM electrolyzer using RuIrCoO<sub>x</sub> electrocatalysts for the oxygen evolution electrode, *Int. J. Hydrogen Energ.*, 2013, **38**, 12667-12673.
